# Supplementary material for: DUX4r, ZNF384r and PAX5-P80R mutated B-cell precursor acute lymphoblastic leukemia frequently undergo monocytic switch
Source: PubMed Central journal article supplement — Haematologica. 2020 Jul 9;106(8):2066–75. doi: 10.3324/haematol.2020.250423 (PMC8327733; doi:10.3324/haematol.2020.250423), 2020-07-09
Supplement: 2020_250423_NOVAKOVA_SUPPL.pdf [file 2020_250423_NOVAKOVA_SUPPL.pdf]

## **DUX4r, ZNF384r and PAX5-P80R mutated B-cell precursor acute lymphoblastic leukemia frequently undergo monocytic switch**

**Michaela Novakova,<sup>1,2,3\*</sup> Marketa Zaliova,<sup>1,2,3\*</sup> Karel Fiser,<sup>1,2\*</sup> Barbora Vokrmanova,<sup>1,2</sup> Lucie Slamova,<sup>1,2,3</sup> Alena Musilova,<sup>1,2</sup> Monika Brüggemann,<sup>4</sup> Matthias Ritgen,<sup>4</sup> Eva Fronkova,<sup>1,2,3</sup> Tomas Kalina,<sup>1,2,3</sup> Jan Stary,<sup>2,3</sup> Lucie Winkowska,<sup>1,2</sup> Peter Svec,<sup>5</sup> Alexandra Kolenova,<sup>5</sup> Jan Stuchly,<sup>1,2</sup> Jan Zuna,<sup>1,2,3</sup> Jan Trka,<sup>1,2,3</sup> Ondrej Hrusak<sup>1,2,3#</sup> and Ester Mejstrikova<sup>1,2,3#</sup>**

<sup>1</sup>CLIP - Childhood Leukemia Investigation Pragerague, Czech Republic; <sup>2</sup>Department of Paediatric Hematology and Oncology, Second Faculty of Medicine, Charles University, Prague, Czech Republic; <sup>3</sup>University Hospital Motol, Prague, Czech Republic; <sup>4</sup>Department of Internal Medicine II, University Hospital Schleswig-Holstein, Kiel, Germany and <sup>5</sup>Comenius University, National Institute of Children's Diseases, Bratislava, Slovakia

*\*MN, MZ and KF contributed equally as co-first authors.*

*#OH and EM contributed equally as co-senior authors.*

©2021 Ferrata Storti Foundation. This is an open-access paper. doi:10.3324/haematol.2020.250423

Received: February 18, 2020.

Accepted: June 25, 2020.

Pre-published: July 9, 2020.

Correspondence: *ESTER MEJSTRIKOVA* - ester.mejstrikova@lfmotol.cuni.cz

---

**Table S1. S1a.** List of antibodies used for diagnostic immunophenotyping.

| Antibody | Fluorochrome    | Clone      | Catalogue number | Manufacturer    |
|----------|-----------------|------------|------------------|-----------------|
| CD2      | PE              | 39C1.5     | A07744           | Beckman Coulter |
| CD3      | FITC            | UCHT1      | 1F-202-T100      | Exbio           |
| CD4      | PE-Cy7          | MEM-241    | T7-359-T100      | Exbio           |
| CD5      | PerCP-Cy5.5     | L17F12     | T9-691-T100      | Exbio           |
| CD7      | APC             | 124-1D1    | 1A-183-T100      | Exbio           |
| CD8      | APC-Cy7         | MEM-31     | T4-207-T100      | Exbio           |
| CD10     | PE              | SS2/36     | R084801          | Dako            |
| CD11b    | PE              | ICRF44     | 347557           | BD Biosciences  |
| CD11c    | PerCP-Cy5.5     | B-ly6      | 646784           | BD Biosciences  |
| CD13     | PE              | SJ1D1      | A07762           | Beckman Coulter |
| CD14     | Pacific Blue    | MEM-15     | PB-293-T100      | Exbio           |
| CD15     | FITC            | MMA        | 332778           | BD Biosciences  |
| CD16     | Alexa Fluor 700 | 3G8        | A7-646-T100      | Exbio           |
| CD19     | APC             | LT19       | 1A-305-T100      | Exbio           |
| CD19     | PE-Cy7          | J3119      | IM3628           | Beckman Coulter |
| CD20     | FITC            | L27        | 345792           | BD Biosciences  |
| CD22     | FITC            | SJ10.1H11  | IM0779U          | Beckman Coulter |
| CD24     | PE              | ALB9       | IM1428U          | Beckman Coulter |
| CD27     | PE              | M-T271     | 560609           | BD Biosciences  |
| CD33     | PE              | D3HL60.251 | A07775           | Beckman Coulter |
| CD34     | APC             | 581        | IM2472           | Beckman Coulter |
| CD38     | PE              | T16        | IM1832U          | Beckman Coulter |
| CD44     | FITC            | G44-26     | 555478           | BD Biosciences  |
| CD45     | PerCP           | 2D1        | PC-222-T100      | Exbio           |
| CD56     | PE              | NCAM16.2   | 345812           | BD Biosciences  |
| CD64     | FITC            | 22         | B49185           | Beckman Coulter |
| CD65     | FITC            | 88H7       | B36299           | Beckman Coulter |
| CD66c    | FITC            | KOR-SA3544 | IM2039U          | Beckman Coulter |
| CD71     | Alexa Fluor 700 | MEM-75     | A7-235-T100      | Exbio           |
| CD79a    | Alexa Fluor 647 | ZL7-4      | MCA1298A647      | Exbio           |
| CD99     | PE              | 3B2/TA8    | 1P-658-T100      | Exbio           |
| CD117    | PE              | 95C3       | IM1360U          | Beckman Coulter |
| CD371    | APC             | 50C1       | 353606           | BioLegend       |
| IgM      | FITC            | G20-127    | 555782           | BD Biosciences  |
| HLA DR   | PE              | L243       | 1P-690-T100      | Exbio           |
| NG2      | PE              | 7.1        | B92429           | Beckman Coulter |
| TSLPR    | PE              | 1D3        | 322906           | BioLegend       |
| Kappa    | PE              | TB28-2     | 1P-674-T100      | Exbio           |
| Lambda   | FITC            | 1-155-2    | 1F-673-T100      | Exbio           |
| CD3      | APC             | UCHT1      | IM2467           | Beckman Coulter |
| CD22     | APC             | S-HCL-1    | 333145           | BD Biosciences  |
| cyCD79a  | PE              | HM57       | R715901          | Dako            |
| TdT      | FITC            | HT-6       | F713950          | Dako            |
| Lysozyme | PE              | LZ-2       | GM-4133          | Nordic Mubio    |
| MPO      | FITC            | CLB-MPO-1  | IM1874U          | Beckman Coulter |

**S1b. Diagnostic antibody combinations.** B1: FITC, B2: PE, B3: PerCP/PerCP-Cy5.5, B4: PE-Cy7, R1: APC/Alexa Fluor 647, R2: Alexa Fluor 700, R3: APC-Cy7, V1: Syto-41/Pacific Blue, V2: Pacific Orange.

| B1        | B2             | B3    | B4   | R1         | R2        | R3  | V1      | V2   |
|-----------|----------------|-------|------|------------|-----------|-----|---------|------|
| CD4       | CD99           | CD5   | CD3  | CD7        | CD16+CD56 | CD8 | Syto-41 | CD45 |
| CD10      | CD13           | CD45  | CD19 |            |           |     |         |      |
| CD10      | CD33           | CD45  | CD19 |            |           |     |         |      |
| CD15      | CD117          | CD45  | CD19 | CD33       | CD71      |     | Syto-41 |      |
| CD20      | CD10           | CD45  | CD19 | CD34       | CD38      |     | Syto-41 |      |
| CD22      | CD24           | CD45  | CD19 | CD79a      |           |     |         |      |
| CD34      | CD38           | CD45  | CD19 |            |           |     |         |      |
| CD44      | CD27           | CD34  | CD19 | CD10       | CD38      |     | CD20    | CD45 |
| CD64      |                | CD45  | CD19 |            |           |     |         |      |
| CD65      | CD2            | CD45  | CD19 |            |           |     |         |      |
| CD66c     | CD56           | CD45  | CD19 |            |           |     |         |      |
| CD19      | NG2            | CD45  |      |            |           |     |         |      |
| CD19      | TSLPR          | CD45  |      |            |           |     |         |      |
| CD33      | VNN2           | CD34  | CD19 | CD371      |           |     | CD14    | CD45 |
| IgM       | CD19           | CD45  |      |            |           |     |         |      |
| Lambda    | Kappa          | CD20  | CD19 | CD5        |           |     | CD45    |      |
| CD45      | intra-Lysozyme | CD11c | CD34 | CD33       |           |     | CD14    |      |
| intra-TdT | CD7            | CD45  | CD3  | intra-CD3  |           |     |         |      |
| CD7       | CD11b          | CD45  | CD19 | intra-CD22 |           |     |         |      |
| intra-MPO | intra-CD79a    | CD45  | CD19 | intra-CD3  |           |     |         |      |
| intra-IgM | CD19           | CD45  |      |            |           |     |         |      |

**Table S2.** Association of switch with the most frequent recurrent genetic alterations within DUX4r subtype.

|                        |                | Total<br>(n=56) | Switch       |               | p-Value<br>Switch no versus yes |
|------------------------|----------------|-----------------|--------------|---------------|---------------------------------|
|                        |                |                 | No<br>(n=11) | Yes<br>(n=45) |                                 |
| <i>ERG</i> deletion    | No             | 16              | 4            | 12            | 0.46                            |
|                        | Yes            | 38              | 6            | 32            |                                 |
|                        | <i>No data</i> | 2               | 1            | 1             |                                 |
| <i>IKZF1</i> deletion  | No             | 35              | 8            | 27            | 0.17                            |
|                        | Yes            | 10              | 0            | 10            |                                 |
|                        | <i>No data</i> | 11              | 3            | 8             |                                 |
| <i>CDKN2A</i> deletion | No             | 26              | 6            | 20            | 0.44                            |
|                        | Yes            | 19              | 2            | 17            |                                 |
|                        | <i>No data</i> | 11              | 3            | 8             |                                 |
| <i>CDKN2B</i> deletion | No             | 26              | 6            | 20            | 0.44                            |
|                        | Yes            | 19              | 2            | 17            |                                 |
|                        | <i>No data</i> | 11              | 3            | 8             |                                 |
| <i>PAX5</i> deletion   | No             | 36              | 7            | 29            | 0.67                            |
|                        | Yes            | 9               | 1            | 8             |                                 |
|                        | <i>No data</i> | 11              | 3            | 8             |                                 |
| <i>NRAS</i> mutation   | No             | 36              | 9            | 27            | 0.25                            |
|                        | Yes            | 14              | 1            | 13            |                                 |
|                        | <i>No data</i> | 6               | 1            | 5             |                                 |
| <i>KMT2D</i> mutation  | No             | 39              | 9            | 30            | 0.42                            |
|                        | Yes            | 11              | 1            | 10            |                                 |
|                        | <i>No data</i> | 6               | 1            | 5             |                                 |

**Table S3.** Top ranking differentially expressed genes ( $n = 50$ ) between switching and non-switching cases. Only protein-coding genes with absolute fold change  $\geq 2.5$  were considered. Genes with Cluster of Differentiation nomenclature IDs are highlighted.

| ensembl_gene_id        | gene           | CD            | log2Fold Change | padj            | description                                                                                   |
|------------------------|----------------|---------------|-----------------|-----------------|-----------------------------------------------------------------------------------------------|
| ENSG00000154188        | ANGPT1         |               | 4.32            | 1.40E-60        | angiopoietin 1                                                                                |
| ENSG00000169083        | AR             |               | 8.16            | 7.60E-57        | androgen receptor                                                                             |
| ENSG00000133687        | TMTC1          |               | 4.3             | 1.10E-35        | transmembrane O-mannosyltransferase targeting cadherins 1                                     |
| ENSG00000171855        | IFNB1          |               | 7.52            | 3.20E-35        | interferon beta 1                                                                             |
| ENSG00000203727        | SAMD5          |               | 5.2             | 3.20E-35        | sterile alpha motif domain containing 5                                                       |
| ENSG00000119698        | PPP4R4         |               | 4.62            | 1.40E-33        | protein phosphatase 4 regulatory subunit 4                                                    |
| ENSG00000119922        | IFIT2          |               | 3.25            | 1.40E-33        | interferon induced protein with tetratricopeptide repeats 2                                   |
| ENSG00000145794        | MEGF10         |               | 4.57            | 2.50E-32        | multiple EGF like domains 10                                                                  |
| ENSG00000178662        | CSRNP3         |               | 7.07            | 3.70E-32        | cysteine and serine rich nuclear protein 3                                                    |
| ENSG00000170421        | KRT8           |               | 3.21            | 8.70E-28        | keratin 8                                                                                     |
| ENSG00000088538        | DOCK3          |               | 3.12            | 1.80E-25        | dedicator of cytokinesis 3                                                                    |
| ENSG00000144369        | FAM171B        |               | 4.76            | 3.20E-25        | family with sequence similarity 171 member B                                                  |
| ENSG00000145685        | LHFPL2         |               | 2.71            | 3.40E-25        | LHFPL tetraspan subfamily member 2                                                            |
| ENSG00000159674        | SPON2          |               | 2.57            | 3.60E-25        | spondin 2                                                                                     |
| ENSG00000182853        | VMO1           |               | 2.79            | 9.70E-25        | vitelline membrane outer layer 1 homolog                                                      |
| <b>ENSG00000172322</b> | <b>CLEC12A</b> | <b>CD371</b>  | <b>3.83</b>     | <b>4.90E-24</b> | <b>C-type lectin domain family 12 member A</b>                                                |
| ENSG00000091129        | NRCAM          |               | 3.49            | 6.30E-24        | neuronal cell adhesion molecule                                                               |
| ENSG00000165509        | MAGEC3         |               | 6.84            | 4.40E-23        | MAGE family member C3                                                                         |
| ENSG00000180767        | CHST13         |               | 3.57            | 4.90E-23        | carbohydrate sulfotransferase 13                                                              |
| ENSG00000205755        | CRLF2          |               | -4.09           | 5.60E-23        | cytokine receptor like factor 2                                                               |
| ENSG00000256660        | CLEC12B        |               | 4.06            | 8.90E-23        | C-type lectin domain family 12 member B                                                       |
| ENSG00000169855        | ROBO1          |               | -3.7            | 1.30E-22        | roundabout guidance receptor 1                                                                |
| ENSG00000010379        | SLC6A13        |               | 3.21            | 1.30E-22        | solute carrier family 6 member 13                                                             |
| ENSG00000134207        | SYT6           |               | 6.83            | 1.30E-22        | synaptotagmin 6                                                                               |
| ENSG00000133101        | CCNA1          |               | 3.96            | 1.80E-22        | cyclin A1                                                                                     |
| ENSG00000129654        | FOXJ1          |               | 4.03            | 2.60E-22        | forkhead box J1                                                                               |
| ENSG00000187783        | TMEM72         |               | -4.72           | 6.80E-22        | transmembrane protein 72                                                                      |
| ENSG00000144824        | PHLDB2         |               | -2.61           | 7.50E-22        | pleckstrin homology like domain family B member 2                                             |
| <b>ENSG00000240403</b> | <b>KIR3DL2</b> | <b>CD158K</b> | <b>-4.01</b>    | <b>1.70E-21</b> | <b>killer cell immunoglobulin like receptor, three Ig domains and long cytoplasmic tail 2</b> |
| <b>ENSG00000156738</b> | <b>MS4A1</b>   | <b>CD20</b>   | <b>-2.74</b>    | <b>3.40E-21</b> | <b>membrane spanning 4-domains A1</b>                                                         |
| <b>ENSG00000132514</b> | <b>CLEC10A</b> | <b>CD301</b>  | <b>3.67</b>     | <b>7.90E-21</b> | <b>C-type lectin domain containing 10A</b>                                                    |
| ENSG00000164023        | SGMS2          |               | 3.18            | 8.20E-21        | sphingomyelin synthase 2                                                                      |
| ENSG00000100867        | DHRS2          |               | 4.53            | 1.80E-20        | dehydrogenase/reductase 2                                                                     |
| ENSG00000157510        | AFAP1L1        |               | -3.1            | 9.40E-20        | actin filament associated protein 1 like 1                                                    |
| ENSG00000011465        | DCN            |               | 3.17            | 7.50E-19        | decorin                                                                                       |
| <b>ENSG00000158488</b> | <b>CD1E</b>    | <b>CD1E</b>   | <b>4.23</b>     | <b>9.40E-19</b> | <b>CD1e molecule</b>                                                                          |
| ENSG00000137962        | ARHGAP29       |               | -3.38           | 3.20E-18        | Rho GTPase activating protein 29                                                              |
| ENSG00000143850        | PLEKHA6        |               | 2.56            | 3.20E-18        | pleckstrin homology domain containing A6                                                      |
| ENSG00000182676        | PPP1R27        |               | 3.24            | 3.30E-18        | protein phosphatase 1 regulatory subunit 27                                                   |
| ENSG00000184507        | NUTM1          |               | -7.31           | 7.70E-18        | NUT midline carcinoma family member 1                                                         |
| <b>ENSG00000091181</b> | <b>IL5RA</b>   | <b>CD125</b>  | <b>3</b>        | <b>7.70E-18</b> | <b>interleukin 5 receptor subunit alpha</b>                                                   |
| ENSG00000183775        | KCTD16         |               | 2.6             | 8.40E-18        | potassium channel tetramerization domain containing 16                                        |
| ENSG00000183421        | RIPK4          |               | -4.15           | 2.60E-17        | receptor interacting serine/threonine kinase 4                                                |
| ENSG00000198576        | ARC            |               | 3.24            | 3.40E-17        | activity regulated cytoskeleton associated protein                                            |
| ENSG00000185028        | LRRC14B        |               | -2.67           | 4.40E-17        | leucine rich repeat containing 14B                                                            |
| ENSG00000129595        | EPB41L4A       |               | 2.51            | 5.90E-17        | erythrocyte membrane protein band 4.1 like 4A                                                 |
| ENSG00000165186        | PTCHD1         |               | 3.03            | 7.10E-17        | patched domain containing 1                                                                   |
| ENSG00000074590        | NUAK1          |               | 3.3             | 7.90E-17        | NUAK family kinase 1                                                                          |
| ENSG00000147655        | RSPO2          |               | 4.18            | 8.00E-17        | R-spondin 2                                                                                   |
| ENSG00000178882        | RFLNA          |               | 2.99            | 1.10E-16        | refilin A                                                                                     |

**Table S4.** Top ranking differentially expressed genes ( $n = 50$ ) between switching and non-switching cases inside DUX4 rearranged cases. Only protein-coding genes with absolute fold change  $\geq 2.5$  were considered. Genes with Cluster of Differentiation nomenclature IDs are highlighted.

| ensembl_gene_id        | gene           | CD             | log2FoldChange | padj            | description                                         |
|------------------------|----------------|----------------|----------------|-----------------|-----------------------------------------------------|
| ENSG00000169083        | AR             |                | 9.91           | 6.60E-15        | androgen receptor                                   |
| ENSG00000133101        | CCNA1          |                | 5.42           | 5.00E-13        | cyclin A1                                           |
| ENSG00000133104        | SPART          |                | 2.87           | 2.50E-10        | NA                                                  |
| ENSG00000179388        | EGR3           |                | 5.24           | 1.00E-09        | NA                                                  |
| ENSG00000245848        | CEBPA          |                | 5.12           | 8.90E-09        | NA                                                  |
| ENSG00000164283        | ESM1           |                | -6.7           | 2.80E-08        | endothelial cell specific molecule 1                |
| ENSG00000164023        | SGMS2          |                | 4.28           | 4.70E-08        | sphingomyelin synthase 2                            |
| ENSG00000159217        | IGF2BP1        |                | -6.64          | 8.00E-08        | insulin like growth factor 2 mRNA binding protein 1 |
| ENSG00000138798        | EGF            |                | 4.6            | 8.30E-08        | NA                                                  |
| ENSG00000159674        | SPON2          |                | 3.57           | 8.30E-08        | spondin 2                                           |
| ENSG00000196460        | RFX8           |                | 4.54           | 8.30E-08        | NA                                                  |
| <b>ENSG00000122025</b> | <b>FLT3</b>    | <b>CD135</b>   | <b>3.11</b>    | <b>2.10E-07</b> | <b>NA</b>                                           |
| ENSG00000120738        | EGR1           |                | 4.59           | 3.90E-07        | NA                                                  |
| ENSG00000151650        | VENTX          |                | 4              | 9.50E-07        | NA                                                  |
| ENSG00000154188        | ANGPT1         |                | 3.76           | 2.20E-06        | angiopoietin 1                                      |
| ENSG00000146147        | MLIP           |                | 6.97           | 2.60E-06        | NA                                                  |
| <b>ENSG00000131724</b> | <b>IL13RA1</b> | <b>CD213a1</b> | <b>3.17</b>    | <b>3.80E-06</b> | <b>NA</b>                                           |
| ENSG00000084110        | HAL            |                | 2.68           | 4.90E-06        | NA                                                  |
| ENSG00000112299        | VNN1           |                | 4.54           | 5.00E-06        | vanin 1                                             |
| <b>ENSG00000164171</b> | <b>ITGA2</b>   | <b>CD49B</b>   | <b>3.74</b>    | <b>5.70E-06</b> | <b>NA</b>                                           |
| ENSG00000162711        | NLRP3          |                | 2.72           | 6.60E-06        | NA                                                  |
| ENSG00000203727        | SAMD5          |                | 5.61           | 6.60E-06        | sterile alpha motif domain containing 5             |
| ENSG00000242265        | PEG10          |                | -5.56          | 8.20E-06        | paternally expressed 10                             |
| ENSG00000101333        | PLCB4          |                | -3.92          | 1.10E-05        | NA                                                  |
| ENSG00000141448        | GATA6          |                | 4.31           | 1.10E-05        | NA                                                  |
| ENSG00000134531        | EMP1           |                | 3.93           | 1.90E-05        | NA                                                  |
| ENSG00000171794        | UTF1           |                | 4.99           | 2.10E-05        | NA                                                  |
| ENSG00000171903        | CYP4F11        |                | 5.72           | 2.60E-05        | cytochrome P450 family 4 subfamily F member 11      |
| ENSG00000147655        | RSPO2          |                | 5.79           | 2.60E-05        | R-spondin 2                                         |
| ENSG00000152348        | ATG10          |                | -2.84          | 3.10E-05        | NA                                                  |
| ENSG00000186998        | EMID1          |                | 3.19           | 3.10E-05        | NA                                                  |
| ENSG00000182601        | HS3ST4         |                | 3.71           | 3.60E-05        | NA                                                  |
| ENSG00000008197        | TFAP2D         |                | 19.53          | 3.70E-05        | NA                                                  |
| ENSG00000133216        | EPHB2          |                | 3.63           | 3.70E-05        | NA                                                  |
| ENSG00000152503        | TRIM36         |                | 3.32           | 3.70E-05        | NA                                                  |
| ENSG00000180549        | FUT7           |                | 2.92           | 3.70E-05        | NA                                                  |
| ENSG00000196805        | SPRR2B         |                | 19.56          | 3.70E-05        | NA                                                  |
| ENSG00000178662        | CSRNP3         |                | 5.86           | 4.00E-05        | cysteine and serine rich nuclear protein 3          |
| ENSG00000183734        | ASCL2          |                | 3.25           | 4.60E-05        | NA                                                  |
| <b>ENSG00000174123</b> | <b>TLR10</b>   | <b>CD290</b>   | <b>2.6</b>     | <b>6.00E-05</b> | <b>NA</b>                                           |
| ENSG00000109339        | MAPK10         |                | 3.25           | 6.70E-05        | NA                                                  |
| <b>ENSG00000105383</b> | <b>CD33</b>    | <b>CD33</b>    | <b>2.81</b>    | <b>6.90E-05</b> | <b>NA</b>                                           |
| ENSG00000073464        | CLCN4          |                | 2.63           | 7.30E-05        | NA                                                  |
| ENSG00000122641        | INHBA          |                | 3.36           | 7.30E-05        | inhibin subunit beta A                              |
| ENSG00000130158        | DOCK6          |                | 3.2            | 7.30E-05        | NA                                                  |
| ENSG00000145632        | PLK2           |                | 4.18           | 7.30E-05        | NA                                                  |
| ENSG00000165757        | JCAD           |                | 3.22           | 7.60E-05        | NA                                                  |
| ENSG00000177989        | ODF3B          |                | 3.23           | 7.80E-05        | NA                                                  |
| ENSG00000110076        | NRXN2          |                | 2.9            | 9.80E-05        | NA                                                  |
| ENSG00000036565        | SLC18A1        |                | 4.21           | 1.10E-04        | solute carrier family 18 member A1                  |

**Figure S1.** Flow chart showing the number of patients.

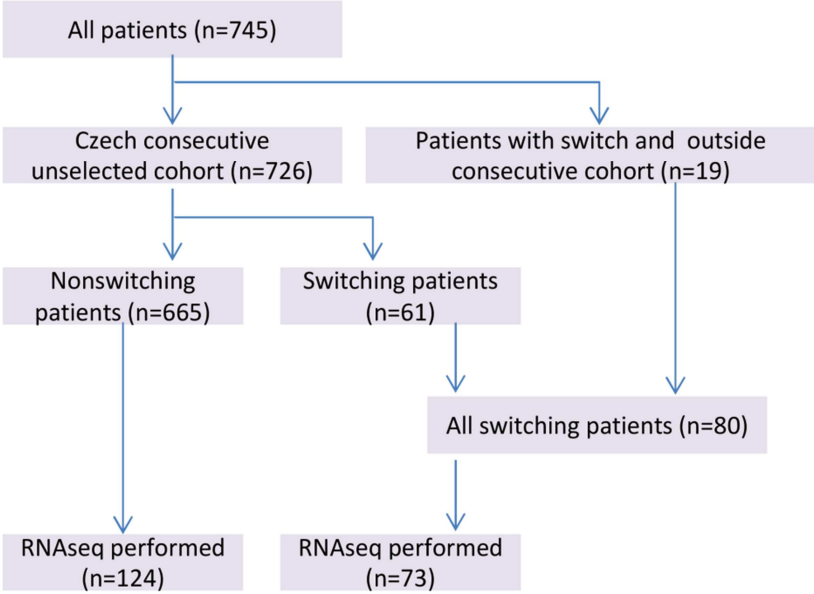

**Figure S2.** Monocytic switch in a typical patient with the DUX4r subtype, d+8 PB sample. Changes in expression of the precursor, B lineage and monocytic markers and side scatter (SSC) are depicted.

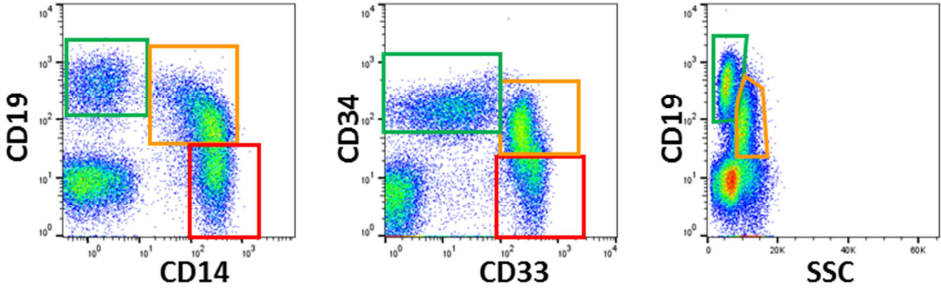

**Figure S3.** Intermediate B-monocytoid cells and monocytes in patients with monocytic switch. **S3a.** Absolute monocyte count by morphology in switching patients. Separately are shown data from randomly selected 122 patients without switch. Subtypes are marked with asterisk if significantly different from non switching patient values by Mann-Whitney test. HYPO, hypodiploid; HHD, hyperdiploid. **S3b.** Dynamics of diagnostic blast count in PB compared to d+8 monocyte count in PB in patients with monocytic switch. HYPO, hypodiploid; HHD, hyperdiploid. **S3c.** The maximum proportion of intermediate B-monocytoid cells defined as  $CD19^{pos}CD14^{pos}$  at time-points d0 (BM, PB), d+8 (PB), d+15 (BM, PB), are d+33 (BM) are shown. Each dot represents the maximum value of a single patient. HYPO, hypodiploid; HHD, hyperdiploid; B-other unknown, B-other without performed RNA-seq.

S3a.

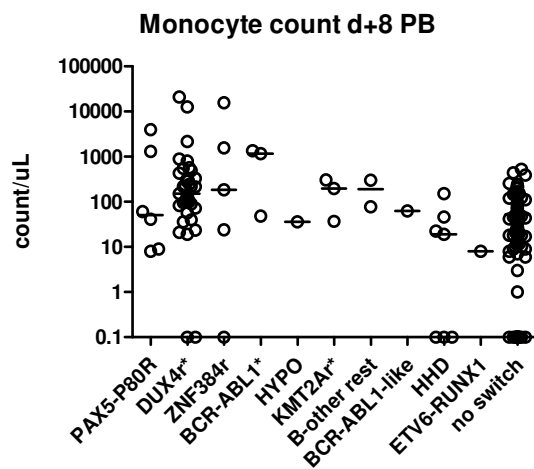

S3b.

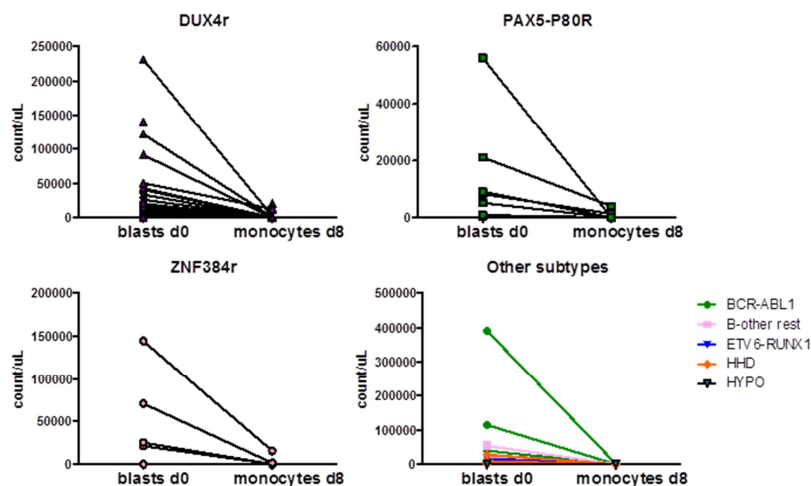



S3c.

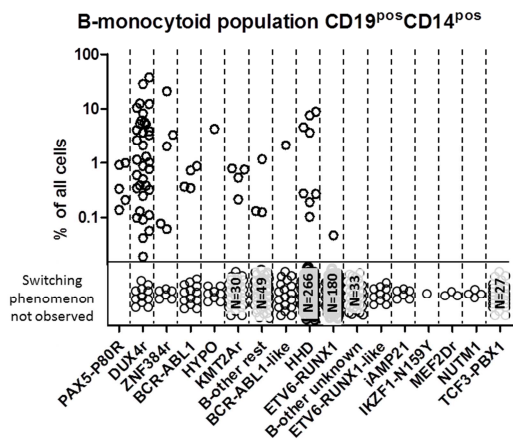

**Figure S4.** Unsupervised Hierarchical Clustering Analysis of all cases ( $n = 197$ ) based on most variable genes (only genes with SD higher than 0.4 times maximum SD,  $n = 271$ ).

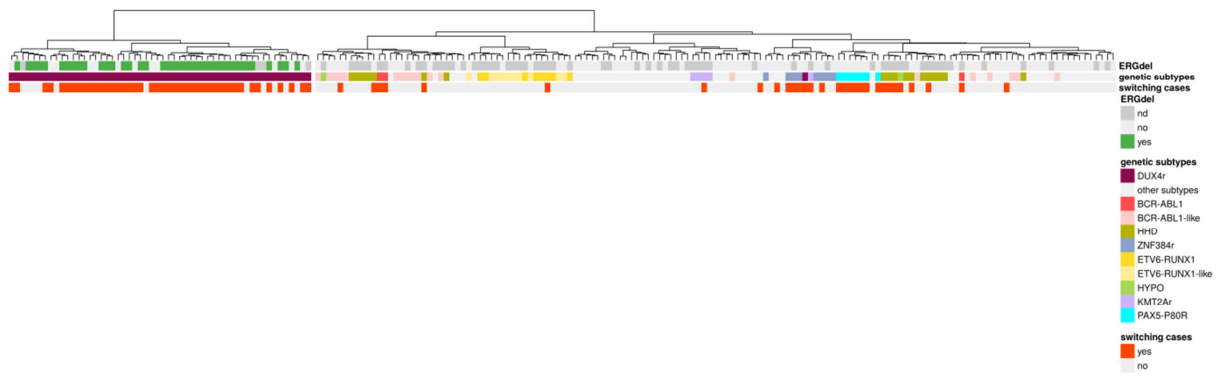

**Figure S5.** Unsupervised Hierarchical Clustering of DUX4r cases ( $n = 55$ ) based on most variable genes (only genes with SD higher than 0.4 times maximum SD).

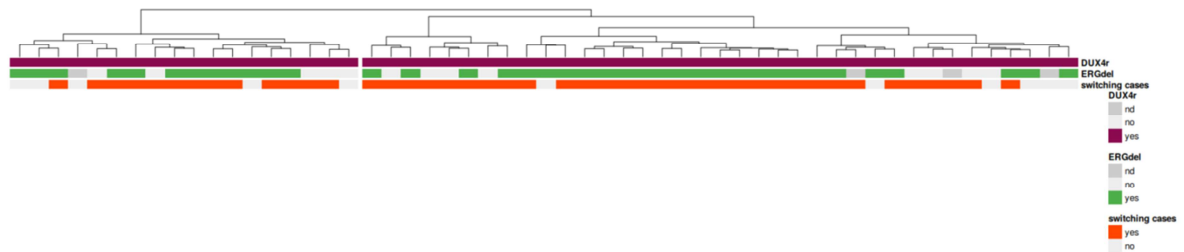

**Figure S6.** Correlation of FC and PCR MRD on d+8 and w+12 in *DUX4r*, *PAX5-P80R* and *ZNF384r*. Spearman's rank correlation coefficient indicated if  $p$  value < 0.05.

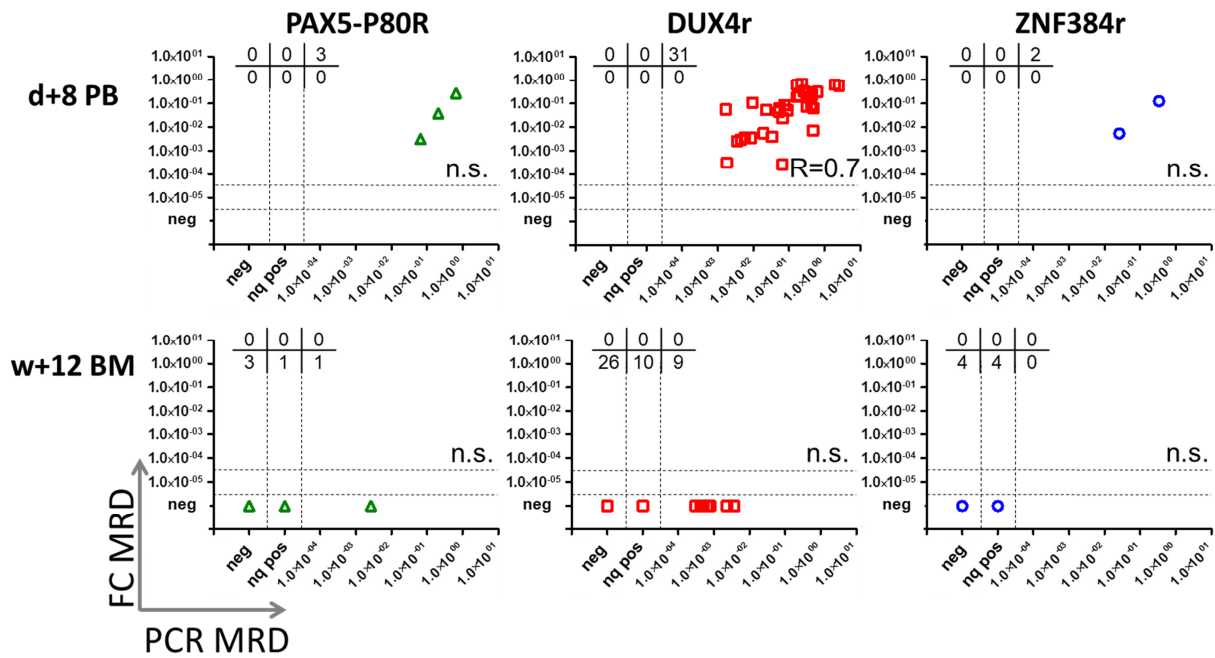

**Figure S7.** Correlation of FC and PCR MRD in *DUX4r*<sup>neg</sup>*PAX5-P80R*<sup>neg</sup>*ZNF384r*<sup>neg</sup> cases with monocytic switch in different time points. Spearman's rank correlation coefficient indicated if  $p$  value < 0.05.

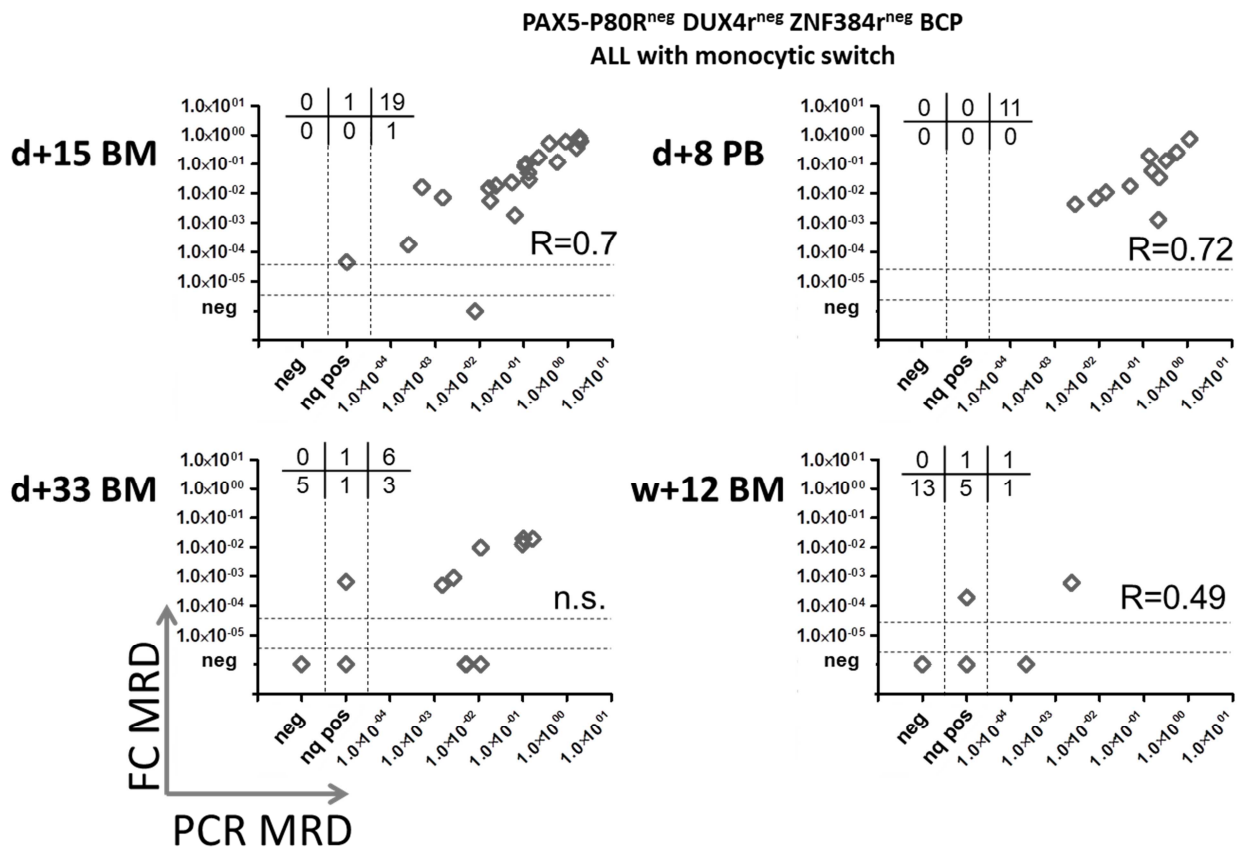

**Figure S8. Immunophenotype of genetic subtypes.** Expressions are positive if present on  $\geq 10\%$  blasts, dim expressions as being positive on  $\leq 50\%$  of blasts.  $CD10^{bright}$  is defined as  $CD10$  overexpression on  $\geq 20\%$  of blasts;  $CD10^{low}$  as being positive ( $\geq 10\%$  of blasts) but not fulfilling definition for  $CD10^{high}$ ;  $CD24^{high}$  as expressed on  $\geq 60\%$  of blasts;  $CD66c^{high}$  as expressed on  $\geq 75\%$  of blasts. Typical phenotype of DUX4r is defined as  $CD10^{low} CD20^{neg} CD34^{pos} CD2^{pos} CD371^{pos}$  (sensitivity 60%, specificity 100%), typical phenotype of ZNF384r as  $CD10^{neg/low} CD13^{pos} CD66c^{neg} CD34^{pos} CD135^{pos} CD24^{low}$  (sensitivity 50%, specificity 99.7%) and PAX5-P80R as  $CD10^{neg/low} CD66c^{high} CD2^{dim/neg} CD4^{neg} CD34^{pos} CD33^{neg/dim}$  or  $CD10^{neg/low} CD66c^{high} CD2^{pos} CD4^{pos} CD34^{neg} CD33^{pos}$  (sensitivity 100%, specificity 98.5%).

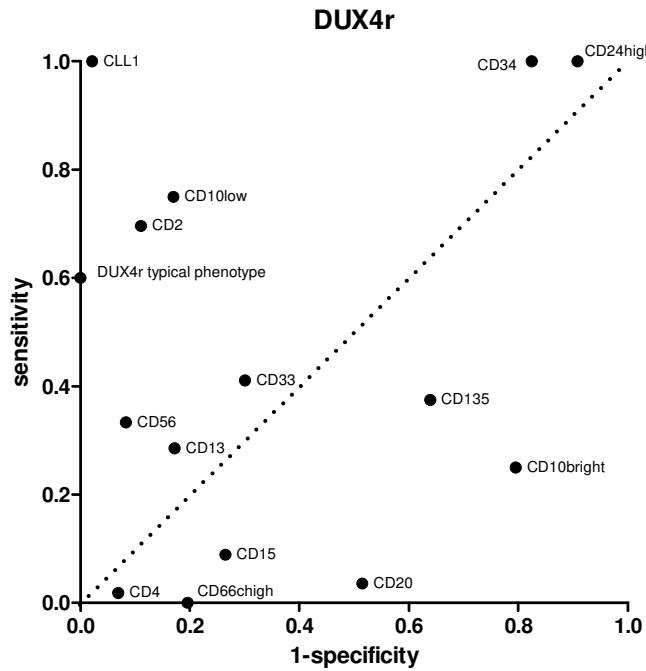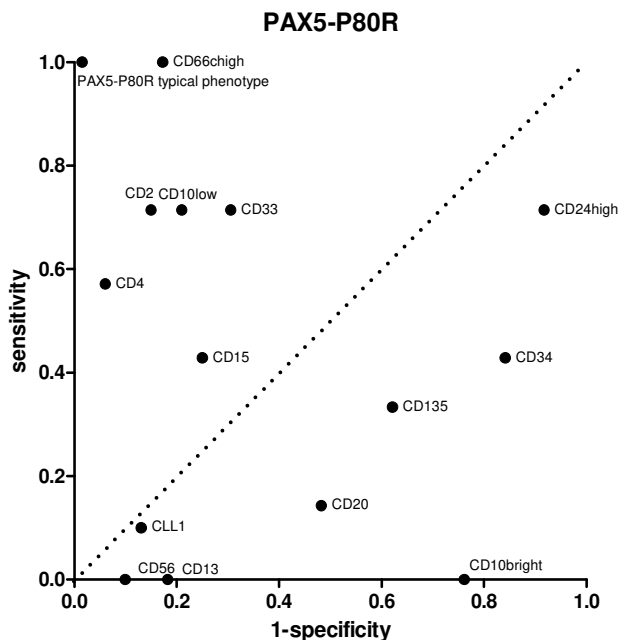

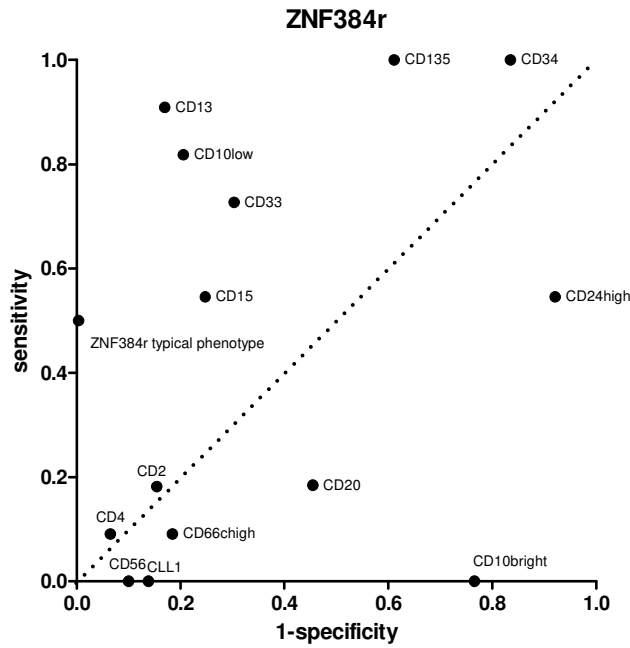

**Figure S9.** Comparison of EFS in patients with ( $n=18$ ) or without ( $n=23$ ) monocytic switch belonging to slow early response (SER) or high risk (HR) prognostic group using PCR MRD data at day 33 and week 12. 5-year EFS of patients with monocytic switch was  $75 \pm 13\%$ , 5-year EFS of patients without monocytic switch was  $50 \pm 9.5\%$ .

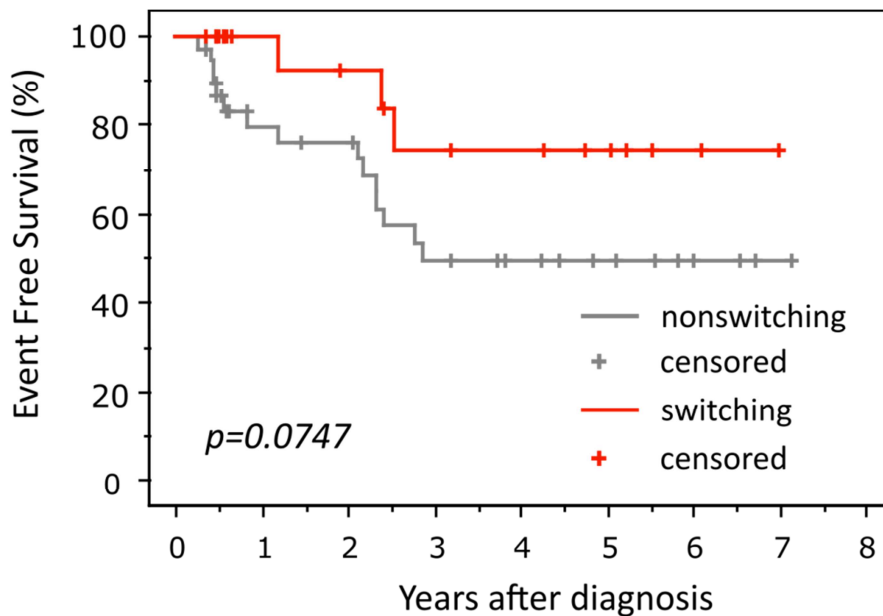

| Number at risk |    |    |    |   |   | censored  |
|----------------|----|----|----|---|---|-----------|
| nonswitching   | 38 | 21 | 10 | 4 | 0 | <b>23</b> |
| switching      | 21 | 11 | 7  | 2 | 0 | <b>18</b> |
